# Supplementary material
Source: PubMed Central journal article supplement (PMC7034190)

SUPPLEMENTARY DATA

**Supplementary Figure 1.** Flowchart for plasma metabolome profiling in the first nested case-control cohort of islet autoimmunity in TEDDY.

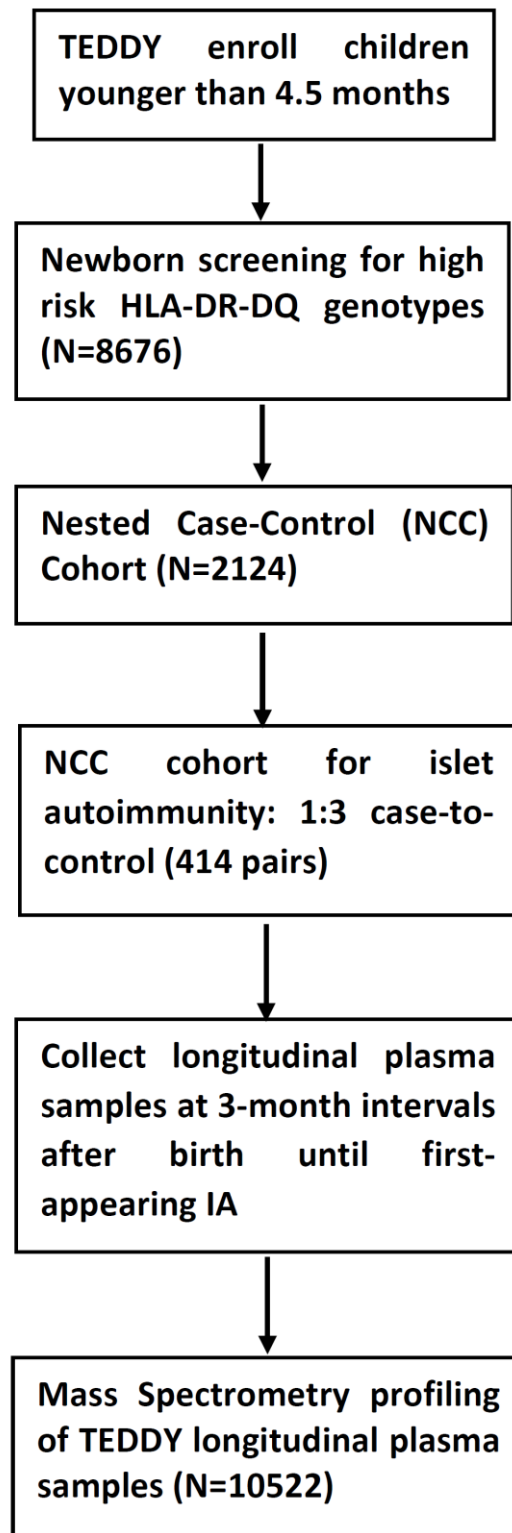

SUPPLEMENTARY DATA

**Supplementary Figure 2.** Principal components plot by Partial Least Square Regression with Discriminant Analysis for samples without or prior to seroconversion at 3, 12, 24, 36-month visits, individually. Samples in red are cases developing islet autoimmunity after that visit, while samples in blue are controls matched to the cases.

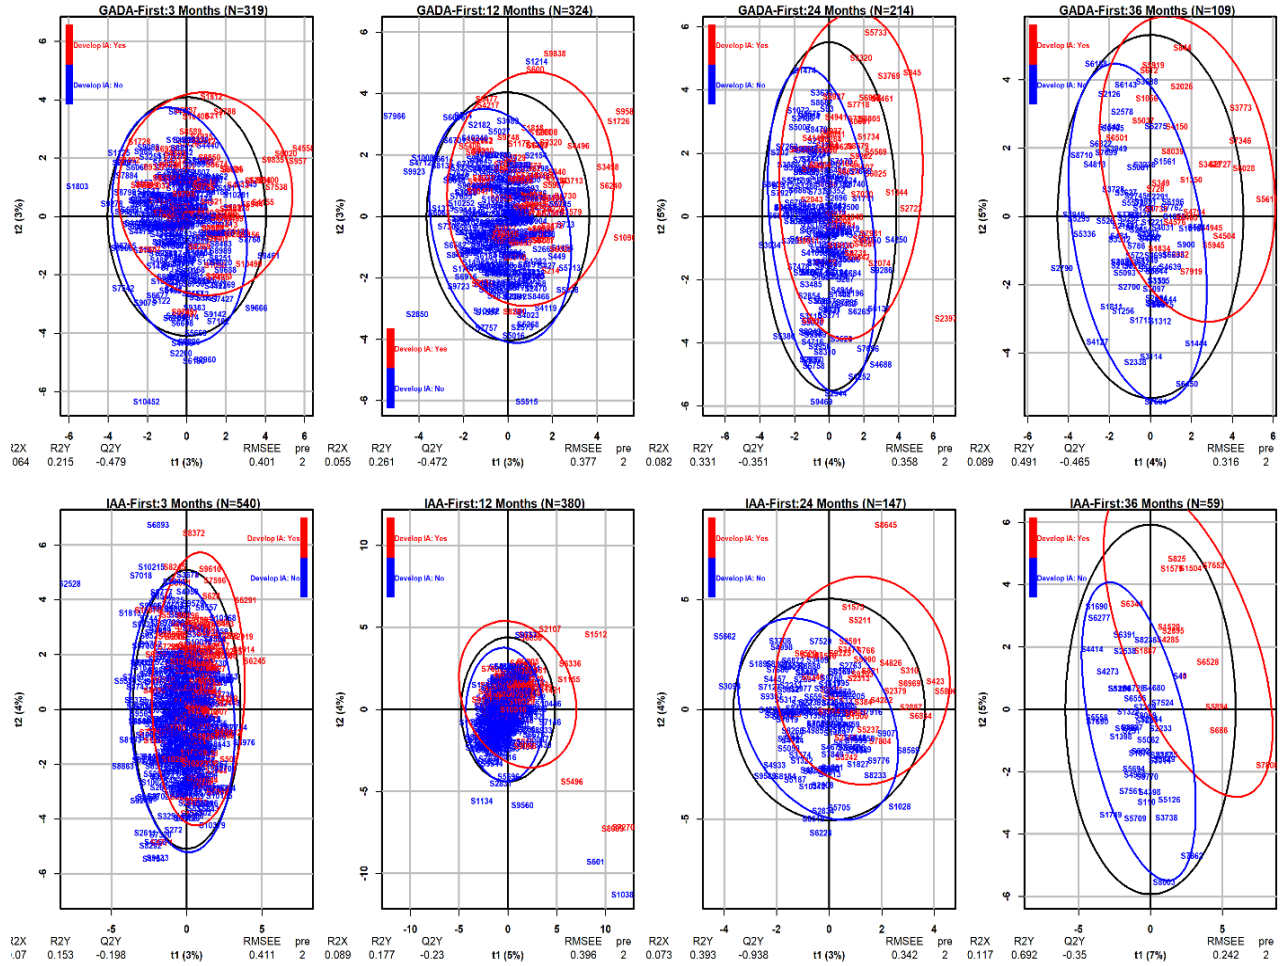

SUPPLEMENTARY DATA

**Supplementary Figure 3.** Mean abundance of gamma-aminobutyric acid, glutamic acid, glutamine, alpha-ketoglutarate, leucine, and Plasmeyl-PC (ether PC) per time point before seroconversion for cases and controls in GADA-First and IAA-First. Time points are the months to seroconversion within 1 year prior IA.

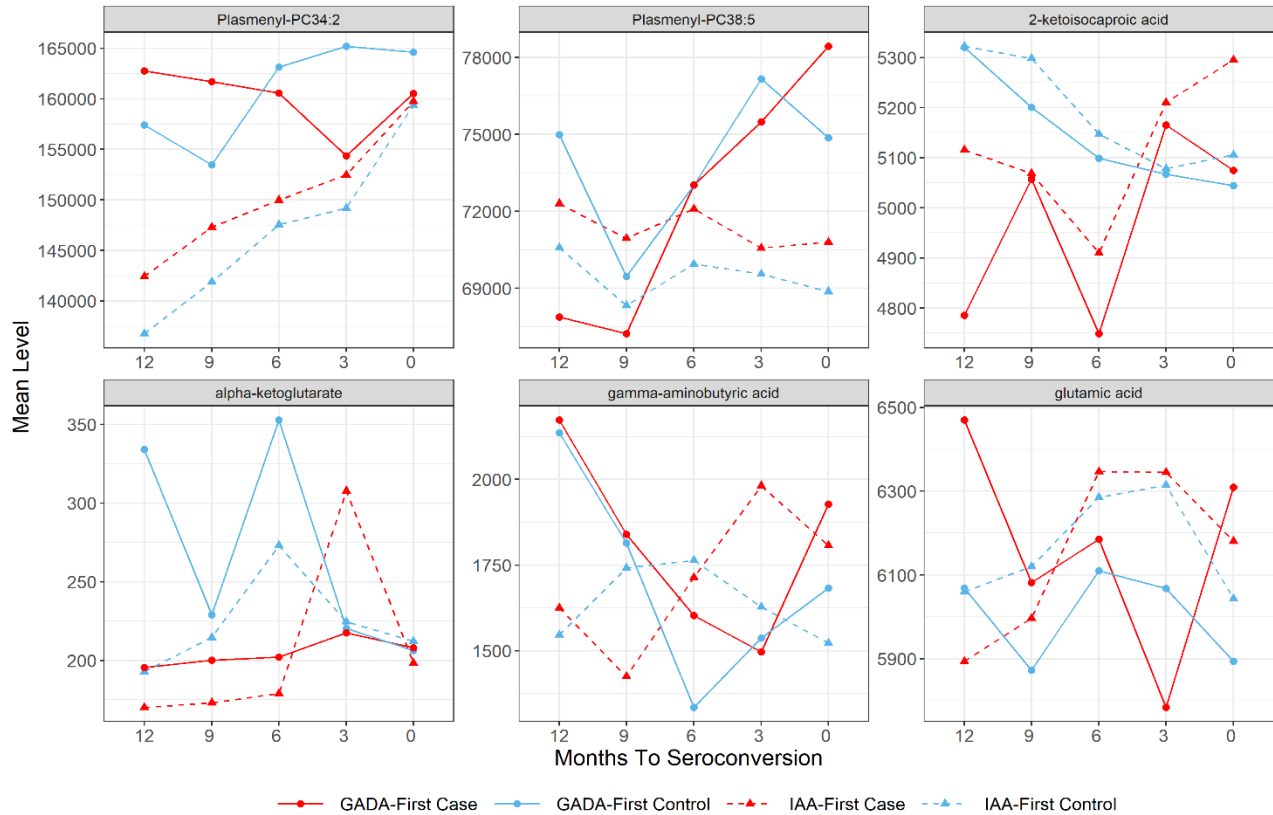

Supplement: DB190756SupplementaryData1.pdf [file DB190756SupplementaryData1.pdf]
